# Supplementary material
Source: PubMed Central journal article supplement (PMC8825455)
Supplement: tpr_rebuttal_supplemental_figs_ddab248.pdf [file tpr_rebuttal_supplemental_figs_ddab248.pdf]

chr1:186318772 G>A

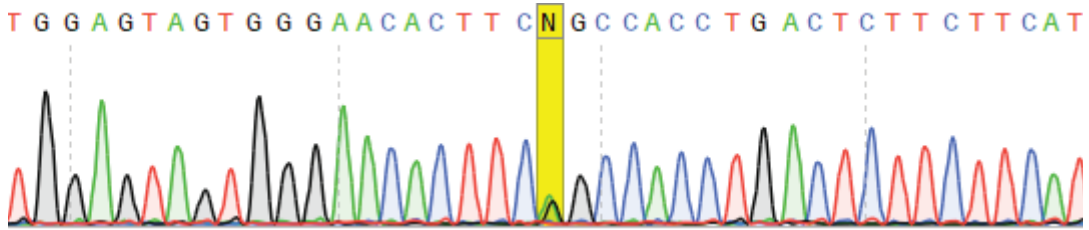

Control (fibroblasts)

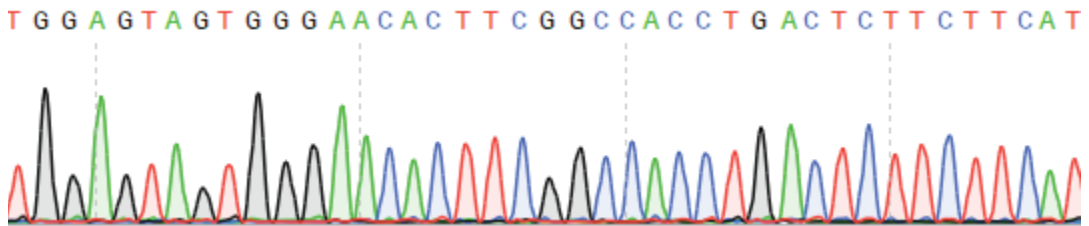

chr1:186351325 C>T

Proband (fibroblasts)

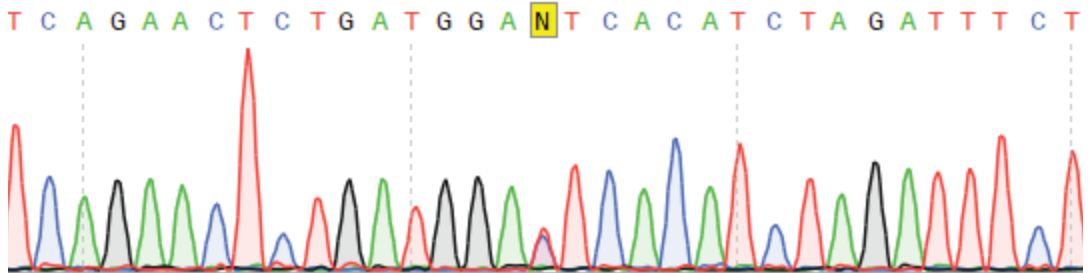

Control (fibroblasts)

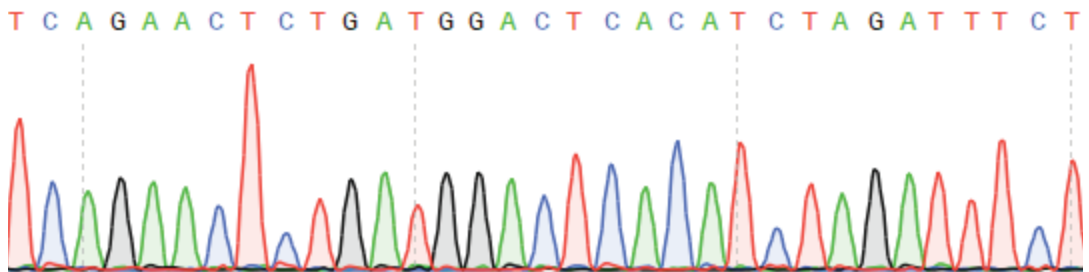

Supplemental Figure 1.

$\alpha$ -TPR - Patient

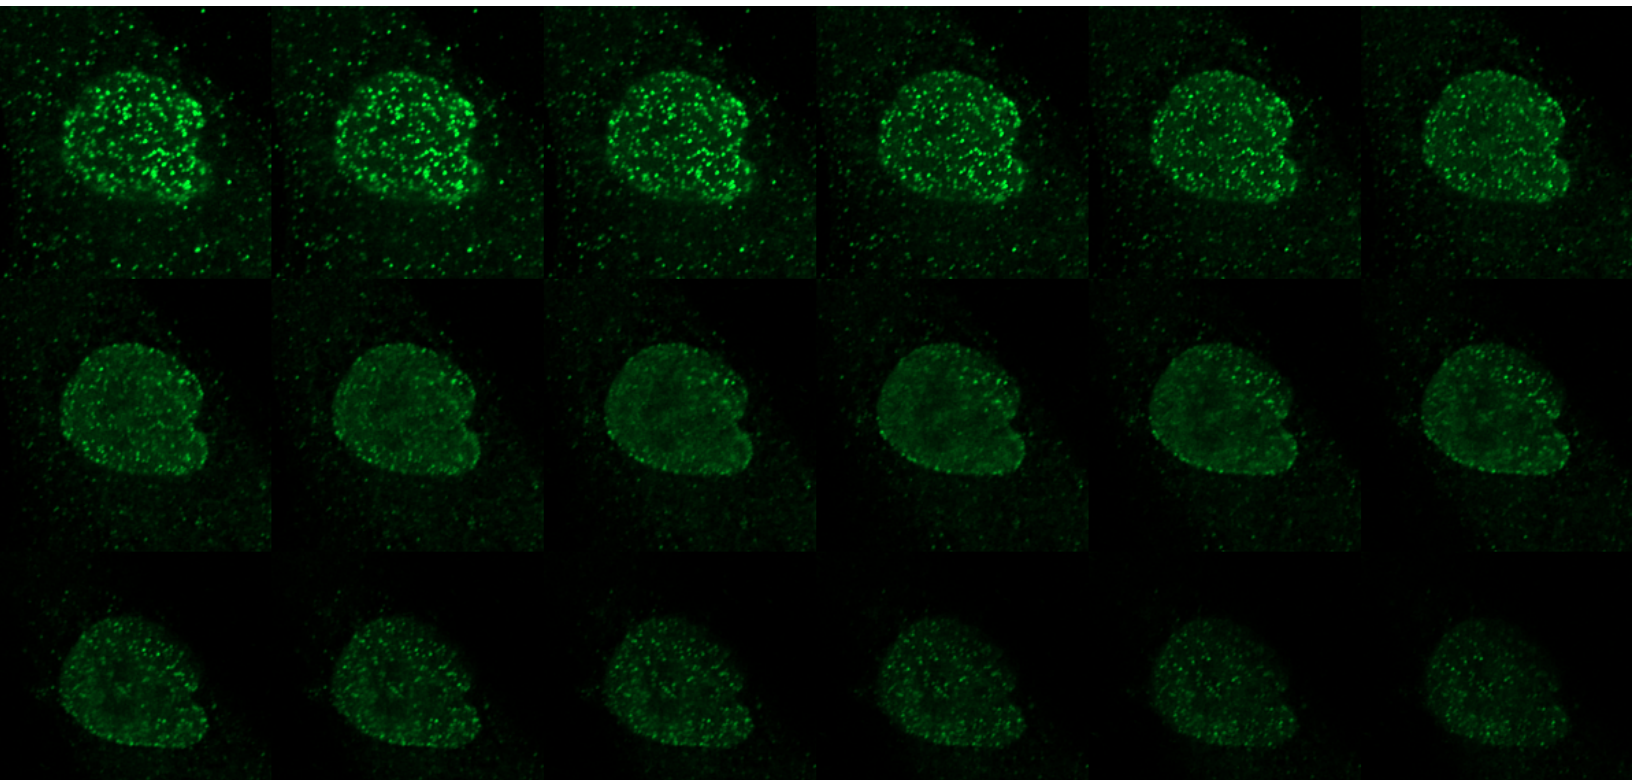

$\alpha$ -TPR - Control

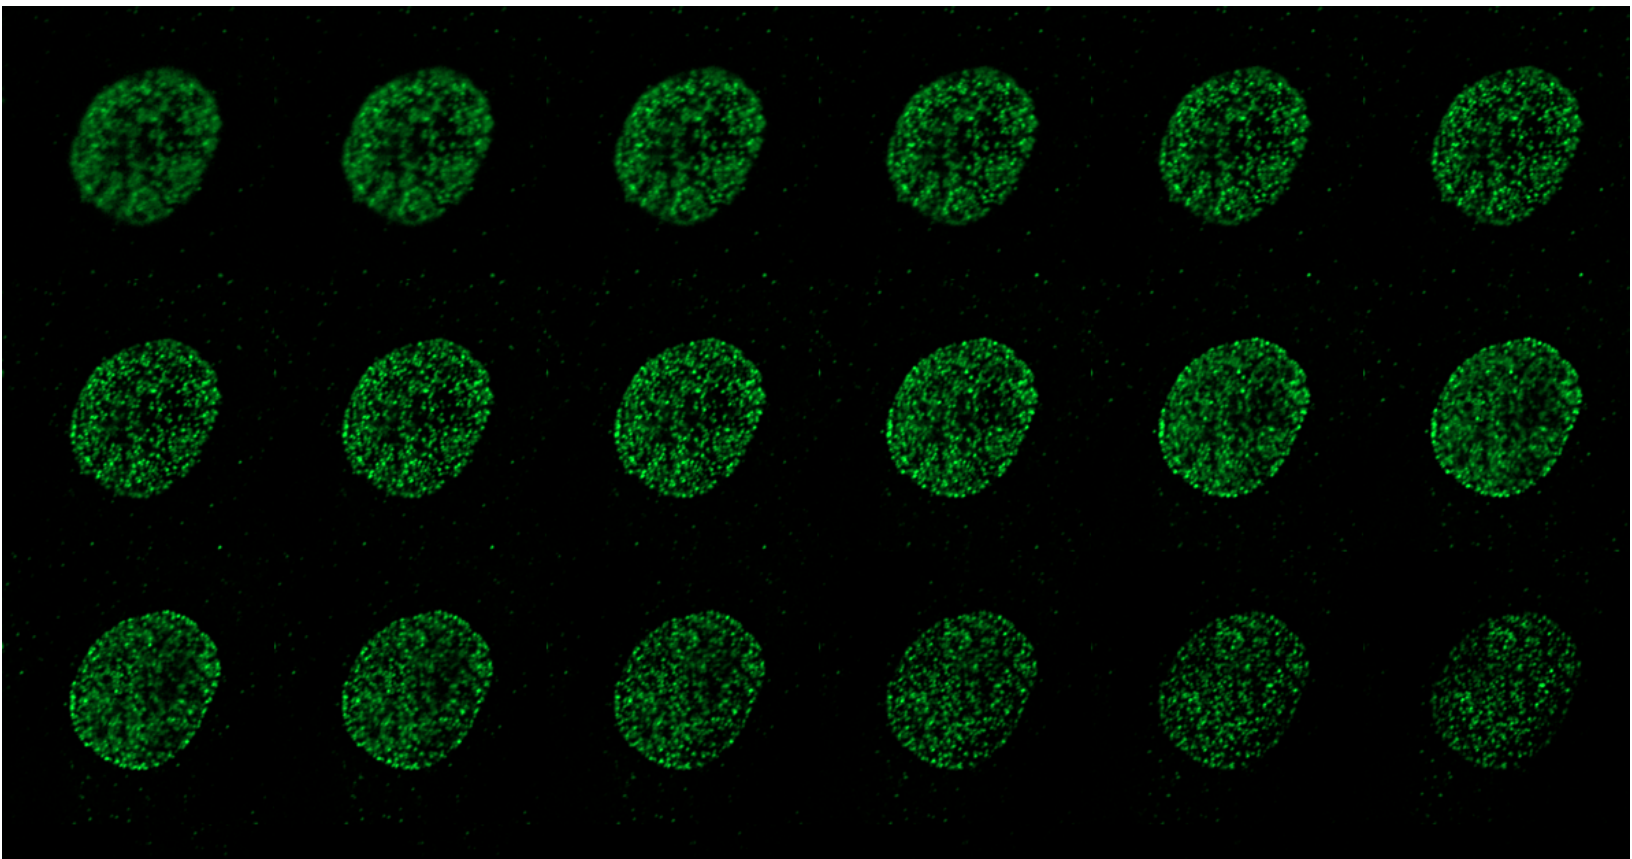

Supplemental Figure 2.



$\alpha$ -MAB414- Patient

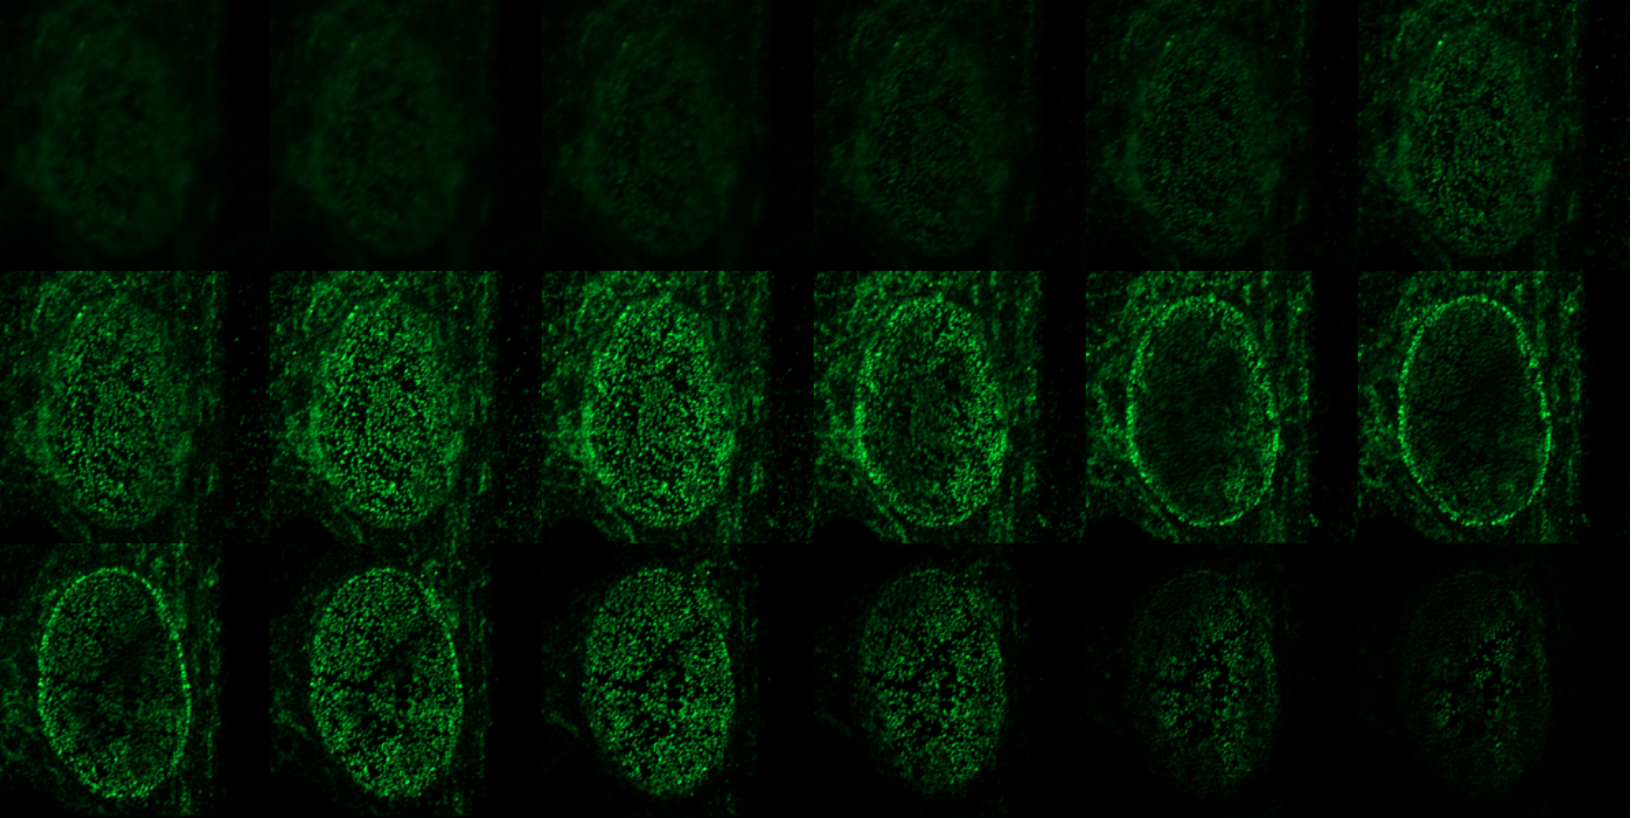

$\alpha$ -MAB414- Control

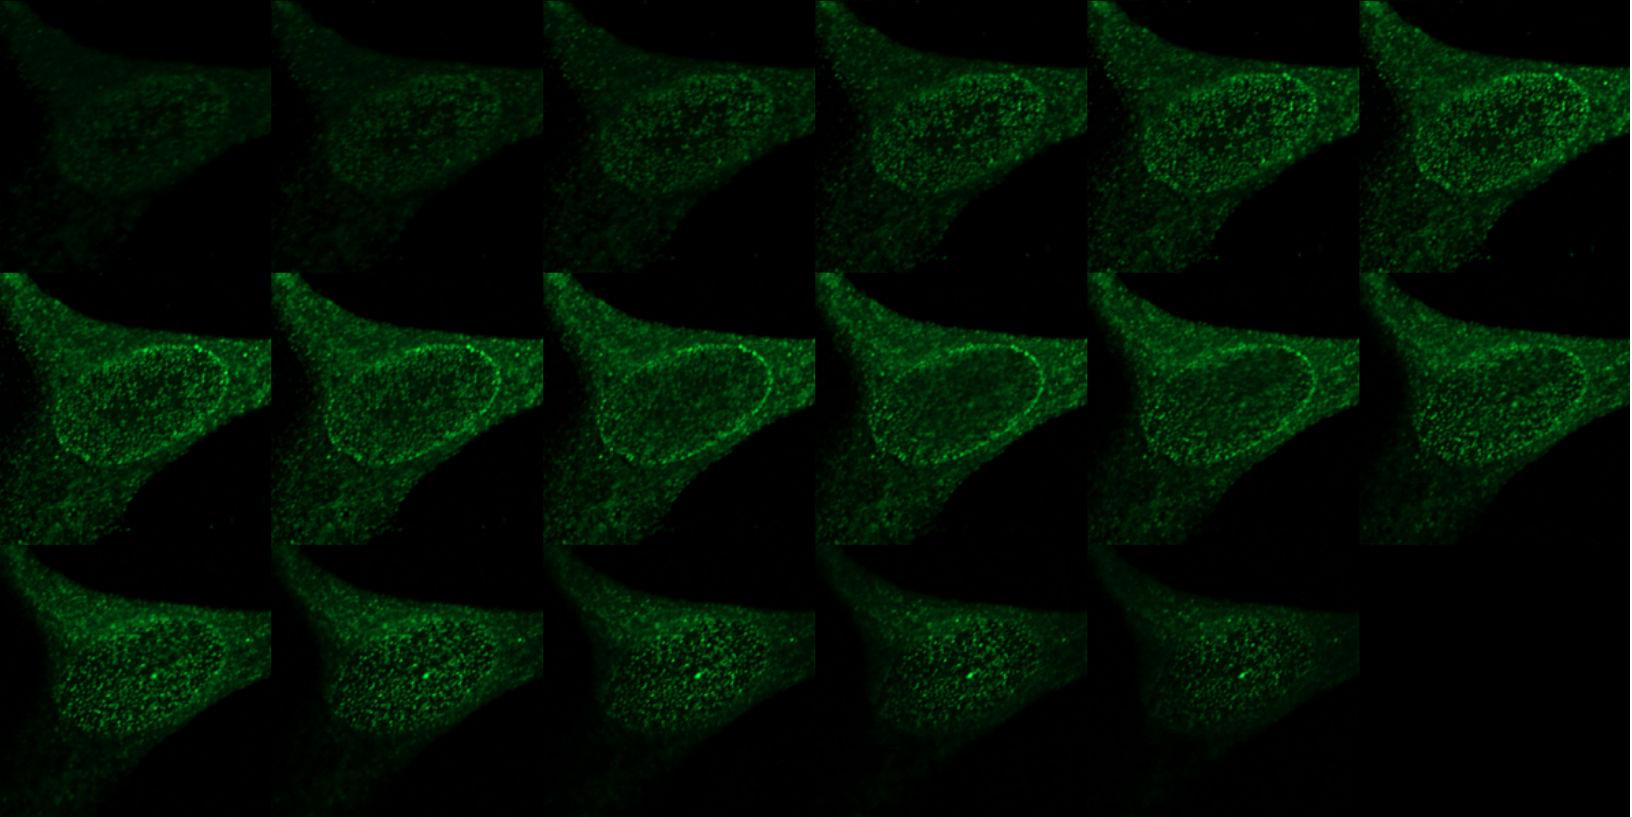

Supplemental Figure 3.
